# Supplementary material for: Loss of slc39a14 causes simultaneous manganese hypersensitivity and deficiency in zebrafish
Source: Oxford University Press journal article supplement (doi:10.1242/dmm.044594), 2022-05-06
Supplement: dmm044594supp.pdf [file dmm044594supp.pdf]

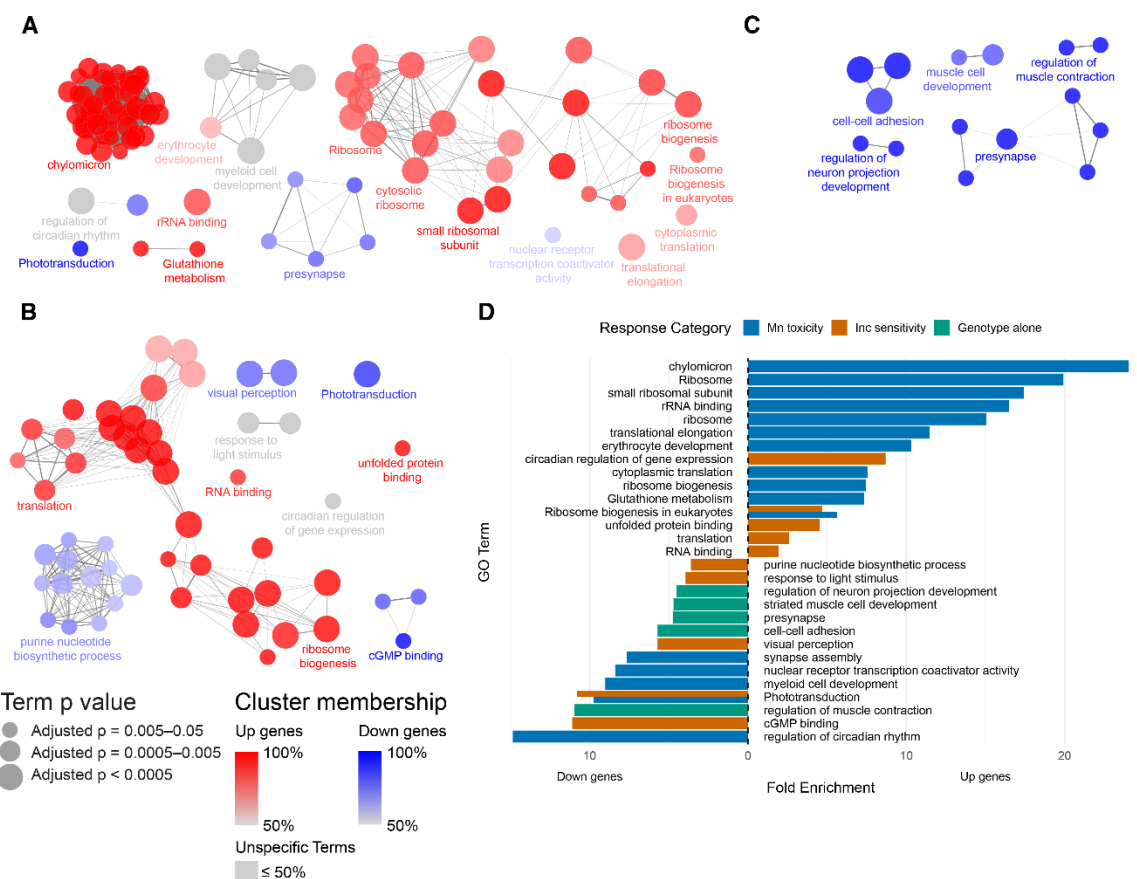

**Fig. S1. Contribution to up- and down-regulated genes to GO enrichments.**

(A-C) ClueGO network diagrams corresponding to the diagrams shown in Fig. 2C, 3G and 5E. Nodes represent enriched GO terms and edges connect nodes that share annotations to the significant genes. Each node is coloured according to the percentage of up/down-regulated genes contributing to the enrichment. Nodes coloured red have > 50% of the genes responsible for the enrichment upregulated, whereas blue nodes have > 50% of the genes downregulated. If the contribution of up/down-regulated genes is equal the nodes are grey. (A) Mn toxicity, (B) Increased sensitivity, (C) Mutant effect. (D) Bar chart showing the same information. The x-axis represents the Fold enrichment,  $\left[ \frac{\text{genes in study set annotated to term}}{\text{genes in reference set annotated to term}} \right]$ . Enrichment caused by upregulated genes are plotted to the right, whereas ones caused by downregulated genes are plotted to the left. blue = enrichments for the Mn toxicity set, orange = enrichments for the Increased sensitivity set, green = enrichments for the Mutant effect set.

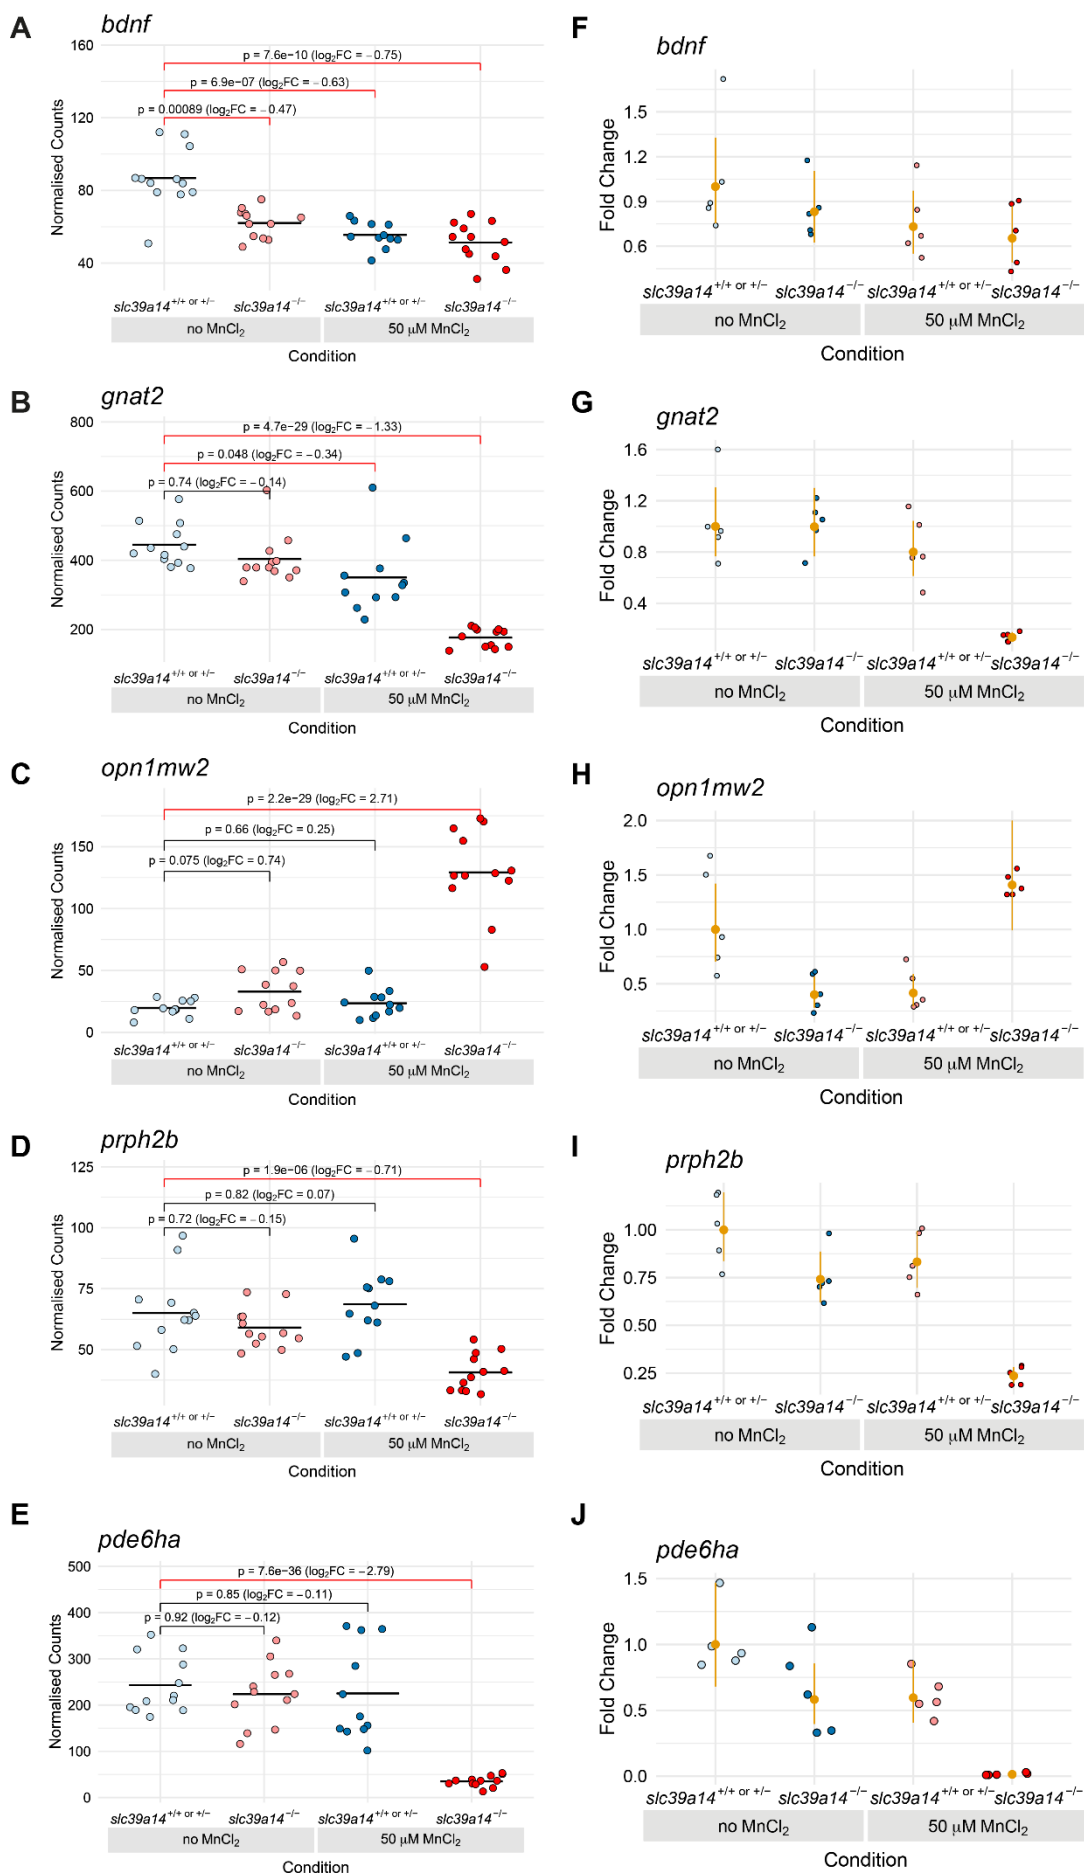

**Fig. S2. qRT-PCR produces consistent results with transcriptome sequencing.**

(A–D) Plots of the normalised counts for each sample for the genes *bdnf*, *gnat2*, *opn1mw2* and *prph2b*. Unexposed sibling embryos are light blue and MnCl<sub>2</sub> exposed ones are dark blue. Unexposed mutants are coloured light red and exposed mutants are dark red.

(E–H) Plots showing the qRT-PCR data for genes *bdnf*, *gnat2*, *opn1mw2* and *prph2b*. Values for individual samples are displayed as fold change relative to the mean value for unexposed siblings with the same colour scheme as in A–D. The mean and 95% confidence intervals for each condition are in orange.

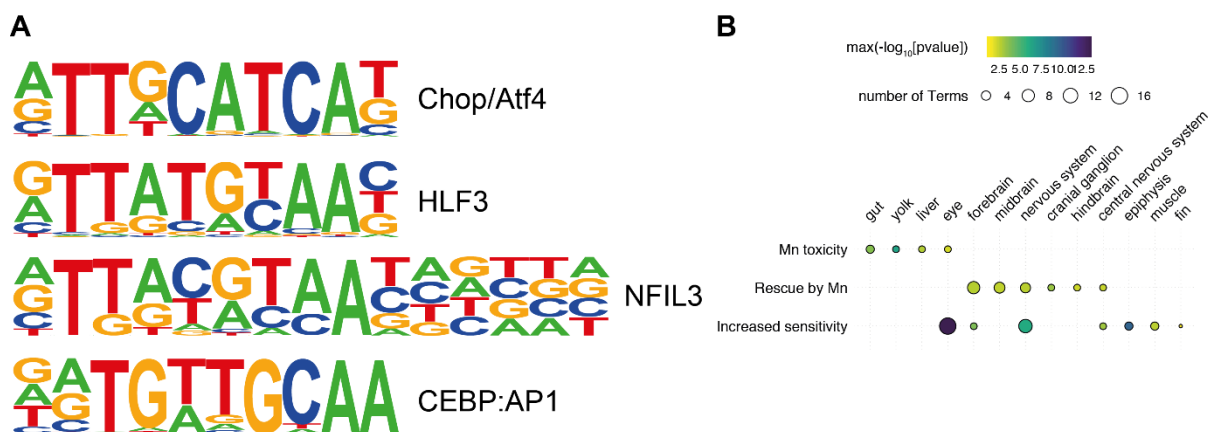

**Fig. S3. Comparative analysis of gene sets.**

(A) Example consensus binding motifs enriched in the promoters of genes that show increased sensitivity to Mn treatment in *slc39a14*<sup>-/-</sup> mutants (Group 1). The height of each base represents its frequency at that position in the consensus motif.

(B) Bubble plot of the ZFA enrichment results across the three categories of response. Individual enriched ZFA terms were aggregated to the tissue/organ level. For example, the terms optic cup, retina and photoreceptor cell are aggregated to the parent term eye. The size of each circle represents the number of individual terms enriched for the particular organ or tissue, and they are coloured by the smallest of the p values (-log<sub>10</sub> scaled).

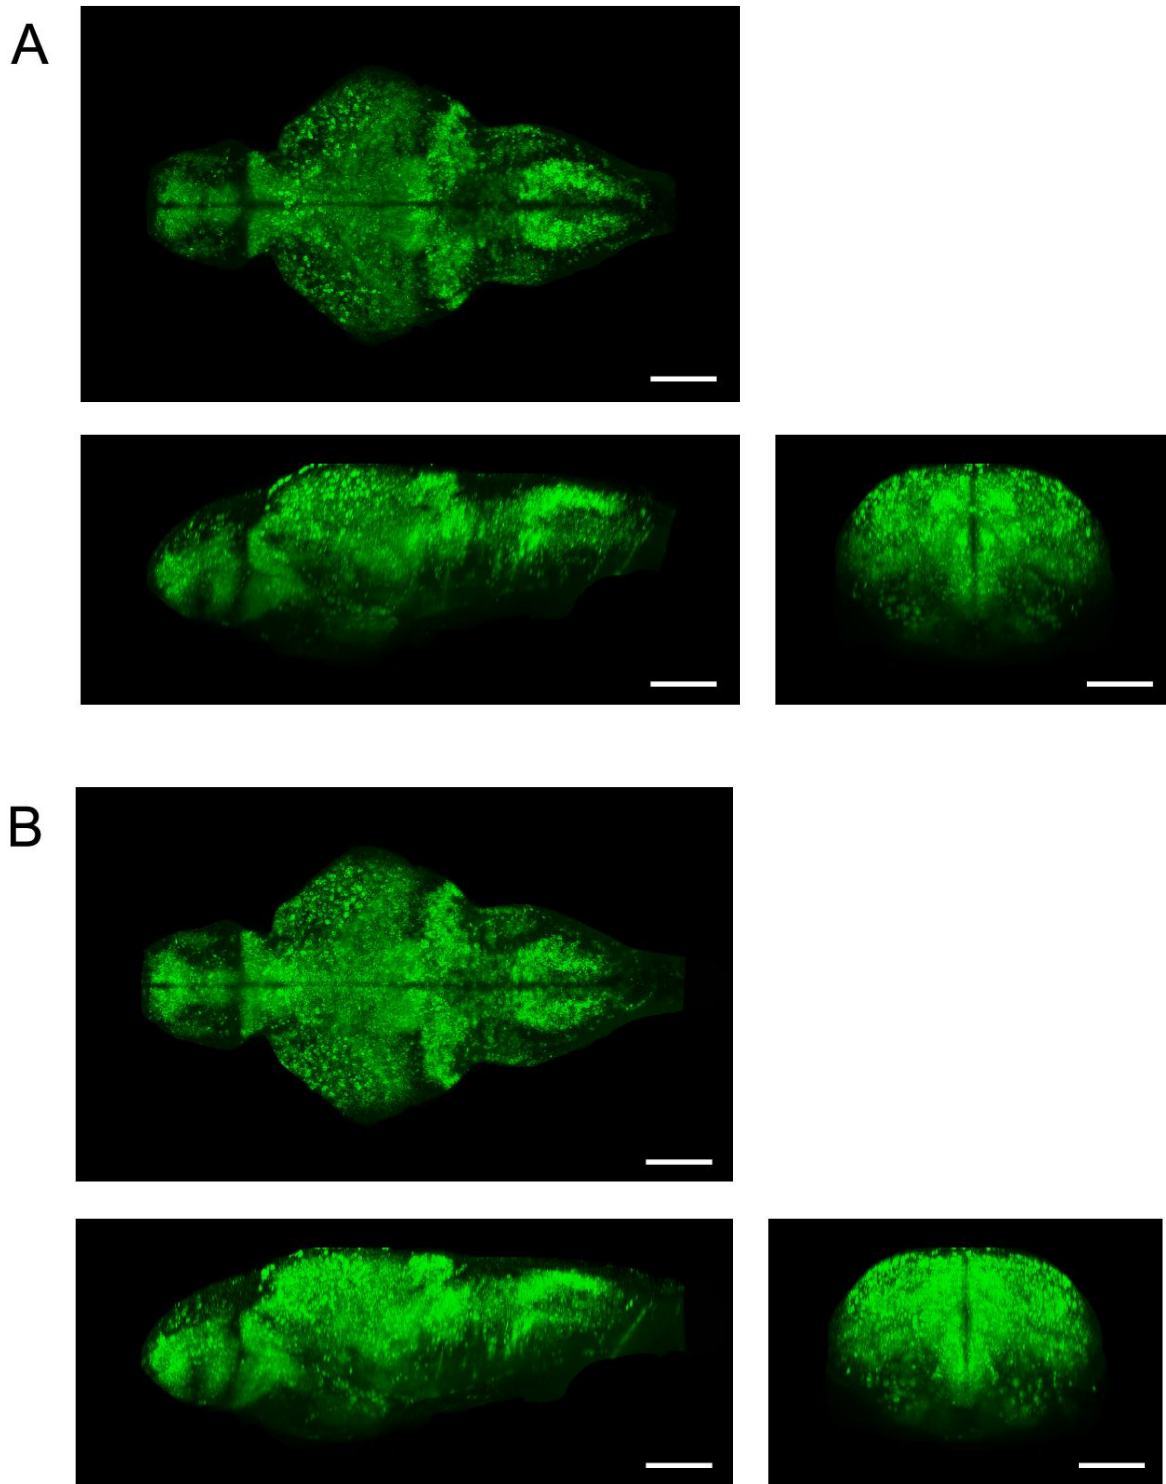

**Fig. S4.** *gad1b* expression is unchanged upon MnCl<sub>2</sub> exposure in *slc39a14*<sup>-/-</sup> zebrafish larvae. *gad1b* mRNA expression assessed by *in situ* HCR in the brain of (A) unexposed and (B) MnCl<sub>2</sub> (50μM) treated homozygous mutant larvae at 6 dpf. Scale bar 100μm.

**Table S1.** List of differentially expressed genes identified by DeTCT and grouped by Mn toxicity (differentially expressed in MnCl<sub>2</sub> exposed siblings compared with unexposed siblings), Increased sensitivity (differentially expressed in MnCl<sub>2</sub> exposed mutants compared with unexposed siblings, but not differentially expressed in unexposed mutants compared to unexposed siblings or exposed siblings compared with unexposed siblings) and Mutant effect (differentially expressed in unexposed mutants compared with unexposed siblings). Also included are genes differentially expressed in unexposed heterozygotes compared with unexposed wild-type embryos (het\_noMnCl<sub>2</sub>\_vs\_wt\_noMnCl<sub>2</sub>) and ones differentially expressed in exposed heterozygotes compared with exposed wild-type embryos (het\_MnCl<sub>2</sub>\_vs\_wt\_MnCl<sub>2</sub>). Genes highlighted in mustard are further discussed in the manuscript. Available at Figshare: <https://dx.doi.org/10.6084/m9.figshare.19550899>

**Table S2.** List of the 10 most highly up- and downregulated genes per group (Mn toxicity, Increased sensitivity and Mutant effect).

|                              | gene          | p-value  | log2 fold change | GO term                          |                             |
|------------------------------|---------------|----------|------------------|----------------------------------|-----------------------------|
| <b>Mn toxicity</b>           |               |          |                  |                                  |                             |
| <b>up</b>                    |               |          |                  |                                  |                             |
| 1                            | fads2         | 2.77E-07 | 1.80             | fatty acid biosynthesis          |                             |
| 2                            | lonrf1l       | 2.02E-18 | 1.53             | metal ion binding                |                             |
| 3                            | cry1bb        | 5.08E-14 | 1.44             | circadian rhythm                 |                             |
| 4                            | eevs          | 1.47E-10 | 1.38             | lyase activity                   |                             |
| 5                            | lonrf1        | 5.64E-16 | 1.25             | metal ion binding                |                             |
| 6                            | ptgdsb.1      | 2.33E-21 | 1.24             | prostaglandin                    |                             |
| 7                            | apoa4b.2      | 4.37E-05 | 1.15             | chylomicron                      |                             |
| 8                            | fech          | 1.32E-11 | 1.11             | erythrocyte development          |                             |
| 9                            | apoa4a        | 0.000111 | 1.09             | chylomicron                      |                             |
| 10                           | soul5         | 3.83E-10 | 1.00             | erythrocyte development          |                             |
| <b>down</b>                  |               |          |                  |                                  |                             |
| 1                            | nr1d4b        | 7.52E-16 | -1.15            | circadian rhythm                 |                             |
| 2                            | dre-mir-132-2 | 2.3E-06  | -1.15            | miRNA                            |                             |
| 3                            | dspa          | 9.43E-05 | -0.99            | cell-cell adhesion               |                             |
| 4                            | sv2a          | 8.77E-06 | -0.95            | synapse, transmembrane transport |                             |
| 5                            | creb5b        | 5.95E-06 | -0.93            | transcription, metal ion binding |                             |
| 6                            | sncb          | 3.86E-06 | -0.85            | dopaminergic                     |                             |
| 7                            | TMEM151A      | 0.000181 | -0.83            | membrane                         |                             |
| 8                            | nfil3-6       | 2.53E-05 | -0.80            | circadian rhythm                 |                             |
| 9                            | large2        | 4.19E-05 | -0.77            | protein glycosylation            |                             |
| 10                           | cipca         | 1.86E-05 | -0.76            | circadian rhythm                 |                             |
| <b>Increased sensitivity</b> |               |          |                  |                                  | <b>additive/synergistic</b> |
| <b>up</b>                    |               |          |                  |                                  |                             |
| 1                            | opn1mw2       | 1.07E-27 | 2.46             | phototransduction                | synergism                   |
| 2                            | hspa5         | 1.91E-32 | 1.63             | protein folding                  | synergism                   |
| 3                            | faim2b        | 1.12E-13 | 1.60             | autophagy                        | synergism                   |
| 4                            | ptpdc1b       | 4.03E-06 | 1.60             | protein dephosphorylation        | additive                    |
| 5                            | zwi           | 0.000101 | 1.53             | myelin sheath                    | additive                    |
| 6                            | fbxo21        | 0.005509 | 1.50             | DNA binding                      | additive                    |
| 7                            | cst14b.1      | 0.002159 | 1.43             | endopeptidase inhibitor          | additive                    |
| 8                            | atf3          | 3.02E-05 | 1.38             | transcription                    | additive                    |
| 9                            | wbp2          | 1.36E-08 | 1.36             | transcription                    | synergism                   |
| 10                           | gtpbp1        | 3.26E-15 | 1.32             | translational elongation         | synergism                   |
| <b>down</b>                  |               |          |                  |                                  |                             |
| 1                            | ctsl          | 3.17E-15 | -4.89            | proteolysis                      | synergism                   |

|                      |               |          |       |                                           |                  |
|----------------------|---------------|----------|-------|-------------------------------------------|------------------|
| 2                    | pde6ha        | 2.1E-35  | -2.68 | phototransduction                         | synergism        |
| 3                    | cyp11c1       | 3.55E-10 | -2.39 | oxidoreductase, metal ion/heme binding    | synergism        |
| 4                    | pde6ha        | 2.91E-11 | -2.09 | phototransduction                         | synergism        |
| 5                    | slc1a2a       | 3.2E-19  | -1.96 | symporter, glutamate                      | synergism        |
| 6                    | dre-mir-124-4 | 0.000506 | -1.76 | miRNA                                     | additive         |
| 7                    | grk1b         | 2.28E-10 | -1.73 | phototransduction                         | synergism        |
| 8                    | guca1g        | 2.1E-08  | -1.71 | phototransduction                         | synergism        |
| 9                    | six4a         | 0.000352 | -1.69 | transcription                             | additive         |
| 10                   | guca1d        | 1.17E-07 | -1.68 | phototransduction                         | synergism        |
| <b>Mutant effect</b> |               |          |       |                                           | <b>Mn rescue</b> |
| <b>up</b>            |               |          |       |                                           |                  |
| 1                    | pxmp2         | 0.000741 | 1.17  | peroxisomal membrane                      | not rescued      |
| 2                    | aacs          | 9.61E-07 | 1.16  | fatty acid metabolism                     | not rescued      |
| 3                    | ddx1          | 0.000861 | 0.90  | RNA helicase                              | rescued          |
| 4                    | mtmr12        | 0.000708 | 0.87  | phosphatidylinositol dephosphorylation    | rescued          |
| 5                    | sqstm1        | 0.000455 | 0.67  | autophagy, metal ion binding              | not rescued      |
| 6                    | alas1         | 7.52E-08 | 0.65  | heme biosynthetic process                 | not rescued      |
| 7                    | dio3b         | 2.76E-05 | 0.62  | thyroxine 5-deiodinase activity           | not rescued      |
| 8                    | wdr44         | 0.000126 | 0.62  | small GTPase binding                      | rescued          |
| 9                    | crebrf        | 0.000825 | 0.56  | transcription, UPR                        | rescued          |
| 10                   | ces3          | 0.000236 | 0.55  | hydrolase activity                        | rescued          |
| <b>down</b>          |               |          |       |                                           |                  |
| 1                    | ebf3a         | 2.19E-06 | -1.87 | transcription, metal ion binding          | rescued          |
| 2                    | klhl24b       | 0.000628 | -1.62 | glutamate receptor                        | rescued          |
| 3                    | pcdh7b        | 1.04E-05 | -1.57 | membrane, calcium ion binding             | rescued          |
| 4                    | fam120c       | 4.07E-05 | -1.55 | nucleus                                   | rescued          |
| 5                    | clec3ba       | 8.74E-05 | -1.55 | bone mineralization                       | rescued          |
| 6                    | ptprga        | 1.18E-06 | -1.52 | protein dephosphorylation                 | rescued          |
| 7                    | bmp7b         | 0.000316 | -1.47 | BMP signaling pathway                     | rescued          |
| 8                    | sv2a          | 8.11E-12 | -1.46 | synapse, transmembrane transport          | rescued          |
| 9                    | phip          | 2.98E-05 | -1.46 | transcription                             | rescued          |
| 10                   | syt6a         | 4.21E-05 | -1.46 | synapse, calcium-ion regulated exocytosis | rescued          |



**Table S3.** List of the 10 most significantly differentially expressed genes with highest p-values for each group (Mn toxicity, Increased sensitivity and Mutant effect).

|                              | gene     | p-value     | log2 fold change | GO term                                                     |                          |
|------------------------------|----------|-------------|------------------|-------------------------------------------------------------|--------------------------|
| <b>Mn toxicity</b>           |          |             |                  |                                                             |                          |
| 1                            | sv2a     | 0.000864522 | -0.95            | Calcium, presynaptic neurotransmitter release               |                          |
| 2                            | igsf9ba  | 6.33E-05    | -0.75            | Cell adhesion, nervous system development                   |                          |
| 3                            | sgcd     | 0.043419419 | -0.68            | Muscle                                                      |                          |
| 4                            | CTBP1    | 0.01601469  | -0.35            | Transcription regulation                                    |                          |
| 5                            | dla      | 0.007417209 | -0.42            | Calcium, neurogenesis, notch                                |                          |
| 6                            | parn     | 0.010107324 | -0.37            | Metal binding, mRNA degradation                             |                          |
| 7                            | efnb2a   | 0.011782537 | -0.36            | Ephrin receptor binding, cell adhesion, axon guidance       |                          |
| 8                            | smurf2   | 0.008605029 | -0.70            | E3 ubiquitin-protein ligase, protein ubiquitination         |                          |
| 9                            | alas1    | 0.00084604  | 0.55             | heme biosynthesis, response to hypoxia                      |                          |
| 10                           | skib     | 0.000942987 | -0.59            | transcription factor, SMAD binding                          |                          |
|                              | gene     | p-value     | log2 fold change | GO term                                                     |                          |
| <b>Increased sensitivity</b> |          |             |                  |                                                             | additive/<br>synergistic |
| 1                            | pde6ha   | 3.36859E-31 | -2.68            | Phototransduction                                           | synergism                |
| 2                            | hspa5    | 1.53395E-28 | 1.63             | Unfolded protein response                                   | synergism                |
| 3                            | opn1mw2  | 5.72801E-24 | 2.46             | Phototransduction                                           | synergism                |
| 4                            | atp1a1b  | 1.27919E-16 | 0.95             | Sodium/potassium-transport, metal binding                   | synergism                |
| 5                            | slc1a2a  | 7.34528E-16 | -1.96            | Excitatory amino acid transporter, glutamate reuptake       | synergism                |
| 6                            | xbp1     | 7.34528E-16 | 0.84             | Unfolded protein response                                   | synergism                |
| 7                            | opn1mw1  | 1.91042E-14 | -0.95            | Phototransduction                                           | synergism                |
| 8                            | rcvrna   | 3.81359E-14 | -1.25            | Phototransduction, calcium binding                          | synergism                |
| 9                            | slc1a2b  | 3.81359E-14 | 0.55             | Excitatory amino acid transporter, glutamate reuptake       | synergism                |
| 10                           | stm      | 6.39958E-13 | 0.63             | Calcium ion transport, ephrin and notch receptor signalling | synergism                |
| <b>Mutant effect</b>         |          |             |                  |                                                             | Mn rescue                |
| 1                            | igf2bp2b | 4.87E-14    | -1.26            | Translation regulation                                      | rescued                  |
| 2                            | gnai2a   | 2.96E-09    | -0.70            | G protein-coupled receptor signaling pathway, metal binding | rescued                  |
| 3                            | anp32a   | 1.52E-08    | -0.74            | Apoptosis, RNA binding                                      | rescued                  |
| 4                            | sv2a     | 2.96E-08    | -1.46            | Calcium, presynaptic neurotransmitter release               | rescued                  |

|    |            |          |       |                                                       |         |
|----|------------|----------|-------|-------------------------------------------------------|---------|
| 5  | adgrl1a    | 1.05E-07 | -1.31 | G protein-coupled receptor activity, cell adhesion    | rescued |
| 6  | strn4      | 1.36E-07 | -1.09 | Calcium, calmodulin binding                           | rescued |
| 7  | igsf9ba    | 1.98E-07 | -0.97 | Cell adhesion, nervous system development             | rescued |
| 8  | pcdh2aa15  | 5.7E-07  | -0.68 | Calcium ion binding, cell adhesion                    | rescued |
| 9  | ace2       | 1.58E-06 | -0.88 | Metal binding, angiotensin maturation                 | rescued |
| 10 | CU929544.1 | 1.58E-06 | -0.48 | Receptor-type tyrosine-protein phosphatase delta-like | rescued |

**Table S4.** List of enriched Gene Ontology (GO) terms. Available at Figshare:

<https://dx.doi.org/10.6084/m9.figshare.19550932>

**Table S5:** Statistical analysis of qRT-PCR data. Available at Figshare:

<https://dx.doi.org/10.6084/m9.figshare.19550938>

**Table S6:** Enrichment of zebrafish anatomy (ZFA) terms. Available at Figshare:

<https://dx.doi.org/10.6084/m9.figshare.19550959>

**Table S7.** Locomotor activity data. Available at Figshare:

<https://dx.doi.org/10.6084/m9.figshare.19550965>

**Table S8.** HOMER enrichment analysis of transcription factor motifs. Available at Figshare:

<https://dx.doi.org/10.6084/m9.figshare.19550968>

**Table S9.** Optokinetic response data. Available at Figshare:

<https://dx.doi.org/10.6084/m9.figshare.19550986>

**Table S10.** HCR *in situ* hybridisation probes.

|                            |                           |
|----------------------------|---------------------------|
| <b>Target mRNA</b>         | <b><i>gad1b</i></b>       |
| Amplifier                  | B1                        |
| Fluorophore                | Alexa 488                 |
| Initiator I1               | Initiator I2              |
| gAggAgggCAgCAAACggAA       | TAgAAgAgTCTTCCTTACg       |
| <b>Probe sequences</b>     |                           |
| Pair1                      | Pair2                     |
| AACAGTGGGACATATCCCTTCTGTT  | ACTGTAGTACCCGCCGTGGCATTCA |
| AAGCGCTCATTGTTGTGCGCACGACA | TTGGAGAAATCTGTCTCATCGCGCG |
| CTATATGTCGTAAGGTGACTGTGTA  | ACAAGCACCGGCTGTTATCCCAATG |
| GCGTGATTGGAGACCACCATTCGGA  | AGGAAATCGATGTCCGACTTGGTGA |
| GCGGGCAGTAGATCTCGCGGAACA   | TGGATTGTGGGCTCCTCGCCGTTTT |
| AGAAAGGGGCTTTGTTAAAAGGGTG  | GTTTACACACAGACCCCACTATTAC |
| TTTGCCAGCCGATGATCTCCCGCA   | GGTGAGAAGAGCGCATCTCCATCTC |
| CACGCACCATCCACATGTAACCACA  | TTTCTGGACATCAACAGTCCTCCAC |
| AAATATTTATACCGCGCAACCATCA  | GACATGCCTTTGGTTTTGACTTCAG |
| CAGACTGAATGGAAAAATCTGACAC  | AGTCCACGGGAAACACCTCAATGCT |
| TTCTCTGACCAGGATGGCTGAAC    | ATGGAGTTGCAGCCCTGCAGAATGC |
| <b>Target mRNA</b>         | <b><i>cfos</i></b>        |
| Amplifier                  | B3                        |
| Fluorophore                | Alexa 546                 |
| Initiator I1               | Initiator I2              |
| gTCCCTgCCTCTATATCTTT       | TTCCACTCAACTTTAACCCg      |
| <b>Probe sequences</b>     |                           |
| Pair1                      | Pair2                     |
| TGCACCGGGAAGACGCGTCGCAGTC  | CGCTGTCGCCGCTCGGTGAAGCCGT |
| TGCTGCCCTGCGATGCACTGATGT   | AGGAGTCGGACGACTGATCGTTGCT |
| CACGTCGACGGTTGCGGCATTTTCGC | TTTCAGCTTGCAGTGTATCGGTGAG |
| AGGTAGTGACGATCTCTGGGACTGA  | ATGTGTTTGGTGTGGAAGAGACCAC |
| TGCAGATGGGTTTGTGTGCGGCGAG  | CTGGGAAGCTGGCGTCGGCCGGGAT |
| CAGAGGAGATCATGGGCTGGACCAT  | ATTGAGCTGCGCCGTTGGAGGGCGC |
| AGGCTGGAGTGCAGGTGACGACGGG  | ACATGAAGGAAGACGTGTAGGTGGT |
| GCGCTAATATATCCAGAAAGTAAA   | CAAAAGTCGAAAAGCACGAGCTATC |

**Table S11.** Download links for sequence data at the European Nucleotide Archive. Available at Figshare: <https://dx.doi.org/10.6084/m9.figshare.19550989>
